# Supplementary material for: Few-layer MoS2flakes as a hole-selective layer for solution-processed hybrid organic hydrogen-evolving photocathodes
Source: Royal Society of Chemistry journal article supplement (doi:10.1039/c6ta10572f), 2017-01-01
Supplement: c6ta10572f1.pdf [file c6ta10572f1.pdf]

## Supporting Information

### **Few-layer MoS<sub>2</sub> flakes as hole-selective layer for solution-processed hybrid organic hydrogen-evolving photocathodes**

Sebastiano Bellani,<sup>a,†</sup> Leyla Najafi,<sup>a,b,†</sup> Andrea Capasso,<sup>a</sup> Antonio Esau Del Rio Castillo,<sup>a</sup> Maria Rosa Antognazza,<sup>c</sup> and Francesco Bonaccorso<sup>a\*</sup>

<sup>a</sup> Graphene Labs, Istituto Italiano di Tecnologia, via Morego 30, 16163 Genova, Italy.

<sup>b</sup> Università degli studi di Genova, Dipartimento di Chimica e Chimica Industriale, Via Dodecaneso 31, 16163 Genova, Italy.

<sup>c</sup> Center for Nano Science and Technology @Polimi, Istituto Italiano di Tecnologia, Via Pascoli 70/3, 20133 Milano, Italy.

† These authors contributed equally

\*E-mail: francesco.bonaccorso@iit.it

### TEM analysis of the MoS<sub>2</sub> flakes

In Fig. 1a of the main text of the manuscript is reported a representative transmission electron microscopy (TEM) image of MoS<sub>2</sub> flakes, showing irregular shaped sheets with lateral size in the 30-800 nm range (mean value  $\sim 275$  nm, *i.e.* mean area approx.  $0.075 \mu\text{m}^2$ ) (see statistical analysis of the TEM images reported in Fig. 1B). Fig. S1 report additional TEM images to better illustrate the morphology of MoS<sub>2</sub> flakes evidenced by Fig. 1a.

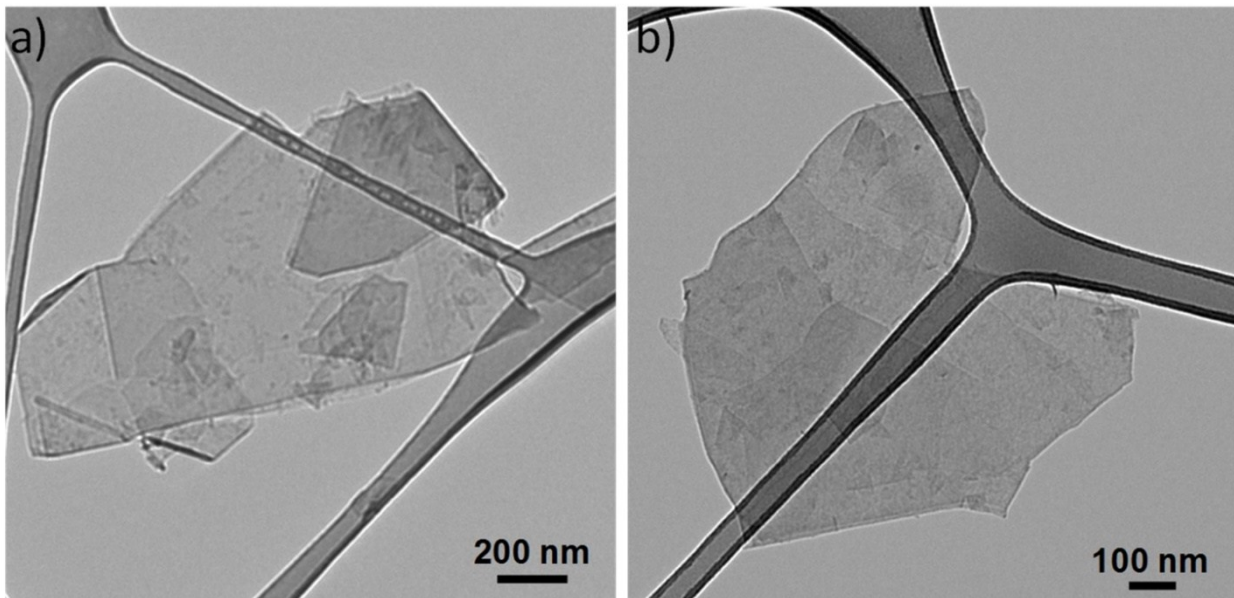

**Fig. S1** a) and b) TEM image of the MoS<sub>2</sub> flakes deposited onto carbon coated Cu TEM grids.

### AFM analysis of MoS<sub>2</sub> flakes

In Fig. 1c of the main text of the manuscript we show a representative AFM image of MoS<sub>2</sub> flakes with thickness of  $\sim 1.2$  nm. Here, Fig. S2a shows an AFM image of MoS<sub>2</sub> flakes with thickness between 3 and 6 nm, while Fig. S2b shows an AFM image of a MoS<sub>2</sub> flake with a thickness up to 5.8 nm. Representative flakes' height profiles are shown in Fig. S2 by red lines.

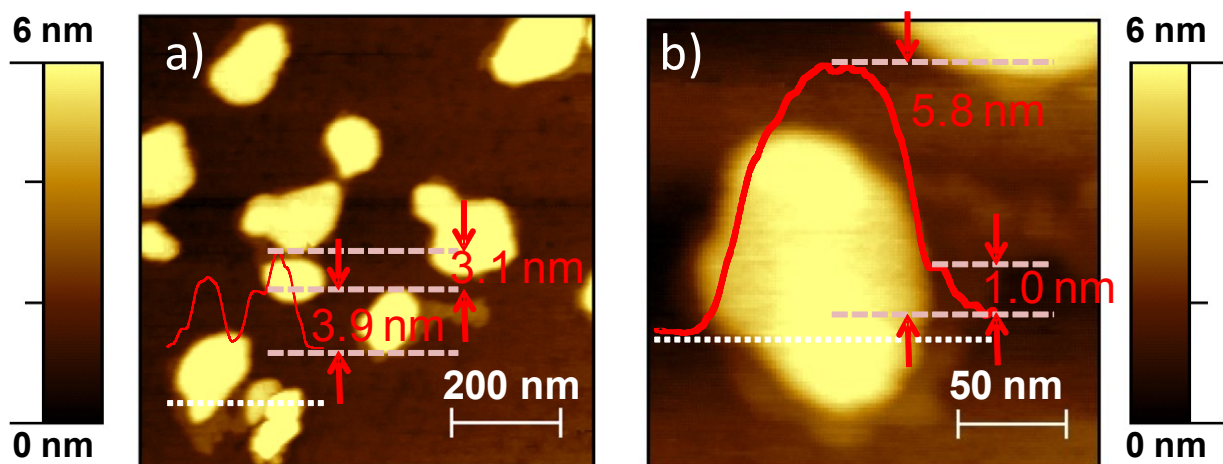

**Fig. S2** a) AFM images of MoS<sub>2</sub> flakes deposited onto a V1-quality mica substrate, showing a multilayer structure (up to  $\sim 6$  nm in thickness). b) AFM image on a zoomed part of image in panel a, showing an approx. 7-layers MoS<sub>2</sub> flake. The height profiles of representative flakes are also shown (red lines).

## Statistical Raman analysis of the MoS<sub>2</sub> flakes

Fig. S3 reports the statistical Raman analysis of the MoS<sub>2</sub> flakes for the position, the full width at half maximum (FWHM) and the difference of the positions of the two main vibrational modes of MoS<sub>2</sub>, i.e.  $E_{2g}^1$  and  $A_{1g}$ , while the Raman features of the bulk MoS<sub>2</sub> are summarized in Table S1. The  $E_{2g}^1(\Gamma)$  mode of the MoS<sub>2</sub> flakes (located at  $\sim 380$  cm<sup>-1</sup>) exhibits softening with respect to the one of the bulk counterpart (located at 378 cm<sup>-1</sup>), while no difference of the peak position of the  $A_{1g}(\Gamma)$  modes ( $\sim 403$  cm<sup>-1</sup>) is observed. Thus, the frequency difference between  $A_{1g}(\Gamma)$  and  $E_{2g}^1(\Gamma)$  (24 cm<sup>-1</sup>) of the MoS<sub>2</sub> decreases of  $\sim 2$  cm<sup>-1</sup> with respect to the bulk MoS<sub>2</sub> (26 cm<sup>-1</sup>), see also Fig. 2b in the main text. The full width at half maximum (FWHM) of the  $E_{2g}^1(\Gamma)$  and  $A_{1g}(\Gamma)$  for the exfoliated MoS<sub>2</sub> increase of  $\sim 2$  cm<sup>-1</sup> and  $\sim 1$  cm<sup>-1</sup>, respectively, if compared with the corresponding modes of bulk MoS<sub>2</sub>. As discussed in the main text of the manuscript, these results confirm the different topological structure of the MoS<sub>2</sub> flakes with respect to the bulk MoS<sub>2</sub>.

1

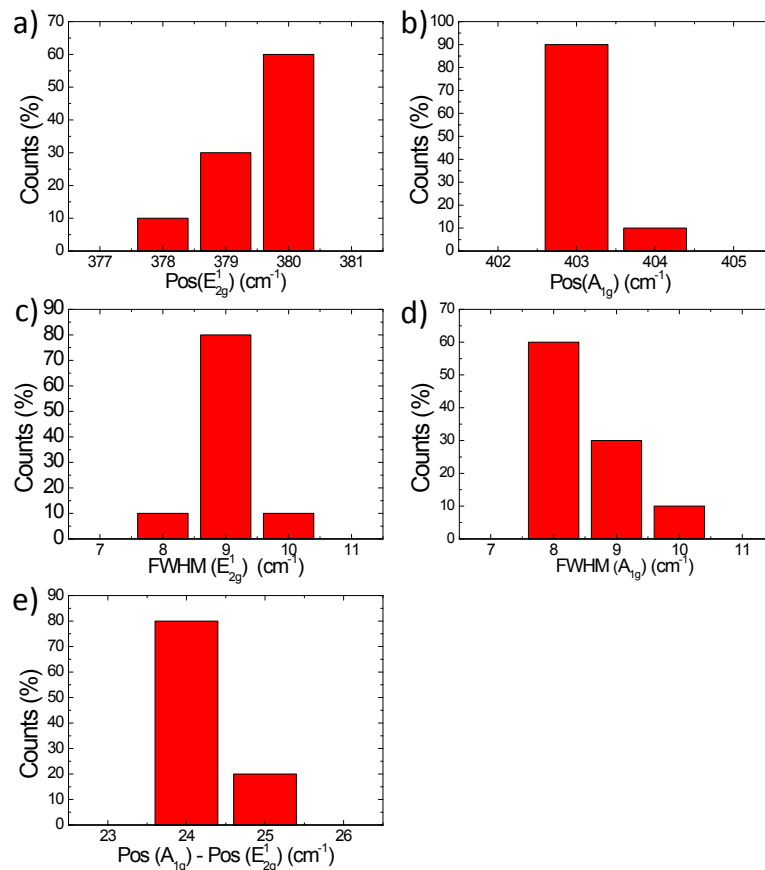

**Fig. S3** Statistical Raman analysis of the MoS<sub>2</sub> flakes for a) the position of  $E_{2g}^1$  mode, b) the position of  $A_{1g}$  mode, c) the FWHM of the  $E_{2g}^1$  mode, d) FWHM of  $A_{1g}$  mode and e) the relative distance of the difference of the positions of the  $A_{1g}$  and  $E_{2g}^1$  modes (calculated on 30 different measurements). MoS<sub>2</sub> is deposited onto a Si wafer with 300 nm thermally grown SiO<sub>2</sub>.

**Table S1** Raman characteristics of bulk MoS<sub>2</sub>.

| POS( $E_{2g}^1$ ) | FWHM( $E_{2g}^1$ ) | POS( $A_{1g}$ ) | FWHM( $A_{1g}$ ) | POS( $A_{1g}$ )-POS( $E_{2g}^1$ ) |
|-------------------|--------------------|-----------------|------------------|-----------------------------------|
|-------------------|--------------------|-----------------|------------------|-----------------------------------|

|     |   |     |   |    |
|-----|---|-----|---|----|
| 378 | 7 | 403 | 7 | 26 |
|-----|---|-----|---|----|

### AFM analysis of FTO/p-MoS<sub>2</sub> (10 mM)

Fig. S4 reports the AFM images for the FTO/p-MoS<sub>2</sub> (10 mM), which shows no differences in surface morphology with respect to the undoped case (FTO/MoS<sub>2</sub>), whose image is shown in Fig. 3b of the main text. As shown in Table 2, the Ra of FTO/p-MoS<sub>2</sub> (10 mM) (Ra = 11.9 nm) has a similar value to that of FTO/MoS<sub>2</sub> (Ra = 11.6 nm). These data suggest that the p-doping treatment up to 10 mM does not affect the surface morphology of the deposited MoS<sub>2</sub> films. These results are in agreement with the SEM analysis of Fig. 4b-c of the main text of the manuscript.

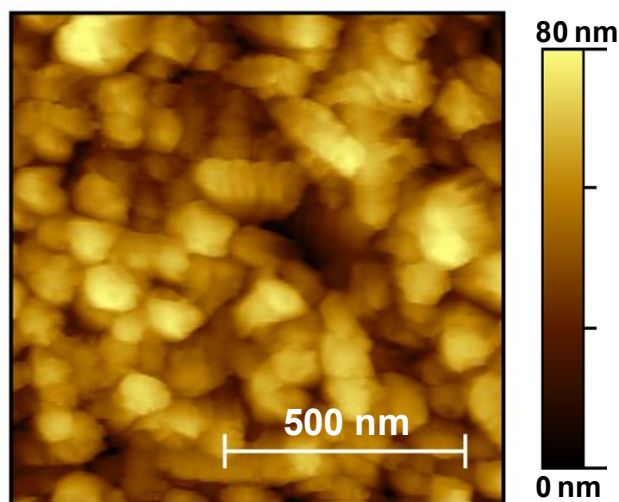

**Fig. S4** AFM images of FTO/p-MoS<sub>2</sub> (10 mM). The MoS<sub>2</sub> films are deposited from a 0.1 mg mL<sup>-1</sup> MoS<sub>2</sub> dispersion in IPA. The calculated roughness average (Ra) is 11.9 nm (see Table 2 in the main text of the manuscript).

### Photoelectrochemical characterization of MoS<sub>2</sub>-based photocathodes fabricated using different concentration of MoS<sub>2</sub> dispersion in IPA

Fig. S5 shows the photoelectrochemical responses of the MoS<sub>2</sub>-based photocathodes fabricated using different concentration (0.05, 0.1, 0.4 mg mL<sup>-1</sup>, dark cyan, orange and green lines) of MoS<sub>2</sub> dispersion in isopropanol (IPA) during the deposition of the MoS<sub>2</sub> films onto FTO. These results reveal that high photocurrent values are obtained for photocathodes with MoS<sub>2</sub> films obtained from 0.1 mg mL<sup>-1</sup> concentration.

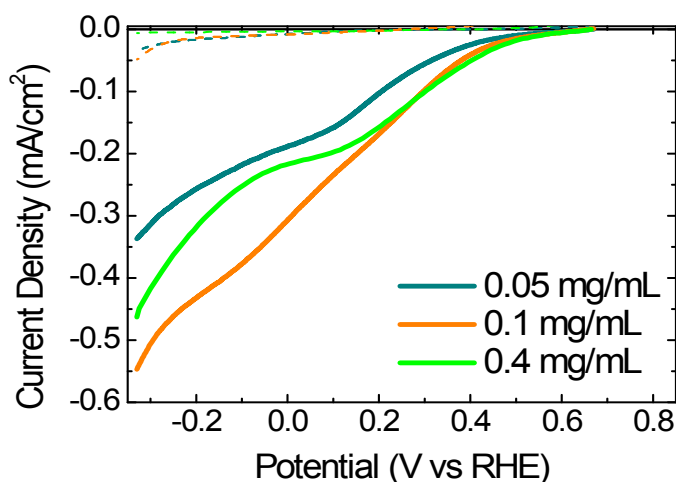

**Fig. S5** linear sweep voltammetry measurements in 0.5 M H<sub>2</sub>SO<sub>4</sub> solution at pH 1, under dark (dashed lines) and AM1.5 light illumination (100 mW cm<sup>-2</sup>) (solid lines) for MoS<sub>2</sub>-based photocathodes fabricated using different concentration (0.05, 0.1, 0.4 mg mL<sup>-1</sup>, dark cyan, orange and green lines) of MoS<sub>2</sub> dispersion in IPA.

### Photoelectrochemical characterization of p-MoS<sub>2</sub> (10 mM)-based photocathodes fabricated using different concentration of MoS<sub>2</sub> dispersion in IPA

Fig. S6 shows the photoelectrochemical responses of the p-MoS<sub>2</sub> (10 mM)-based photocathodes fabricated using different concentration (0.05, 0.1, 0.4 mg mL<sup>-1</sup>, cyan, red and yellow lines) of MoS<sub>2</sub> dispersion in IPA for the deposition of the MoS<sub>2</sub> films onto FTO. As for the undoped MoS<sub>2</sub>-based photocathodes (see Fig. S5), these results reveal that high photocurrent values are obtained for photocathodes with MoS<sub>2</sub> films obtained from 0.1 mg mL<sup>-1</sup> concentration, whose analysis is reported in the main text of the manuscript.

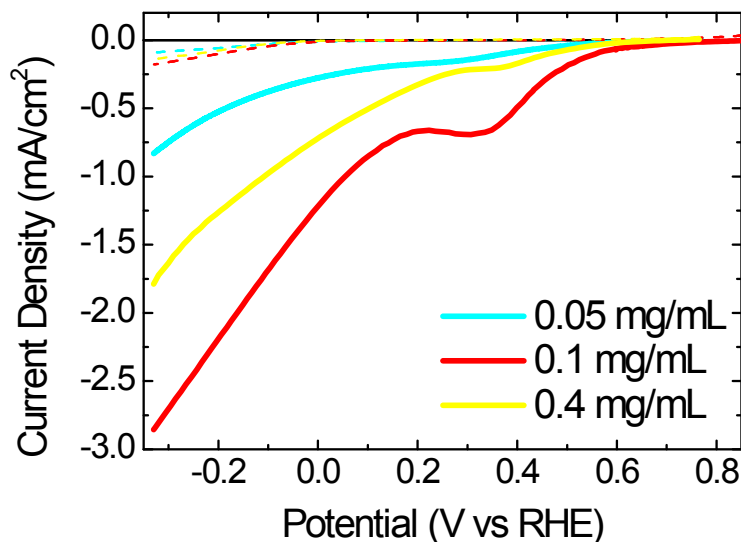

**Fig. S6** Linear sweep voltammetry measured in 0.5 M H<sub>2</sub>SO<sub>4</sub> solution at pH 1, under dark (dashed lines) and AM1.5 light illumination (100 mW cm<sup>-2</sup>) (solid lines) for p-MoS<sub>2</sub> (10 mM)-based photocathodes fabricated using different concentration (0.05, 0.1, 0.4 mg mL<sup>-1</sup>, cyan, red and yellow lines) of MoS<sub>2</sub> dispersion in IPA.

### Linear sweep voltammetry (LSV) measurements of FTO/MoS<sub>3</sub>

Fig. S7 reports two consecutive LSVs of FTO/MoS<sub>3</sub> measured in 0.5 M H<sub>2</sub>SO<sub>4</sub> solution at pH 1, which is the same testing conditions of the LSVs reported in Fig. 6 for the photocathodes studied in this work. It is evident that the first LSV exhibits a broad reduction peak (marked by dashed blue oval) at positive potentials with respect to the HER (located at ~-0.2 V vs. RHE). The peak is reduced during the second LSV, which also shows a shift of the HER activity towards more positive potentials, as indicated by the blue arrow (see also the inset panel where LSV scan are showed over a negatively extended range of potential). These results confirm that during the first LSV scans the MoS<sub>3</sub> is reduced towards more catalytic MoS<sub>2+x</sub> species, as also studied by other works (see ref. 68(b) of the main manuscript).

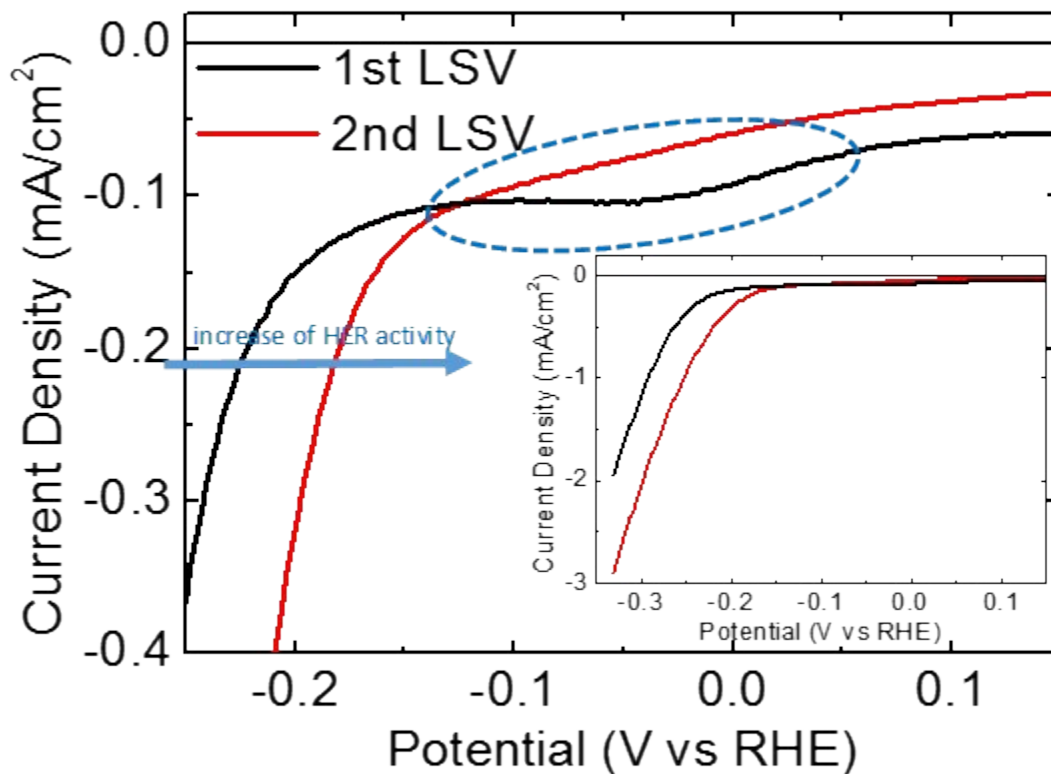

**Fig. S7** Consecutive LSVs of FTO/MoS<sub>3</sub> measured in 0.5 M H<sub>2</sub>SO<sub>4</sub> solution at pH 1. The broad reduction peak at potentials more positive than the HER (located at  $\sim -0.2$  V vs. RHE) is marked dashed blue oval and it is more pronounced during the first LSV. The peak is reduced during the second LSV, which also shows a shift of the HER activity (as evidenced by the blue arrow). The inset panel show the same LSVs of the main panel, extended over larger J and V scales.

### Cyclic Voltammetry measurements on MoS<sub>2</sub> films

Fig. S8 reports Moreover, cyclic voltammetry (CV) measurements of MoS<sub>2</sub> films deposited on glassy carbon (GC) substrates by consequent drop casting steps from 0.4 mg mL<sup>-1</sup> MoS<sub>2</sub> dispersion in IPA until reaching a loading of MoS<sub>2</sub> of 0.5 mg cm<sup>-1</sup>. The figure also reports the CV of GC as reference background, revealing its electrochemical inertness. These data show the absence of irreversible redox reaction involving MoS<sub>2</sub> films under the HER-working condition of the photocathodes reported in Fig. 6 of the main text of the manuscript, in agreement with the electrochemical stability of the MoS<sub>2</sub> expressed in several energy conversion and storage devices, including fuel and water splitting cells, batteries and supercapacitors (see ref. 70-73 in the main text of the manuscript). In the inset to Fig. S8 the HER-electrocatalytic activity of the MoS<sub>2</sub> is also reported by LSV measurement over more negative voltages (up to -0.8 V vs RHE), showing onset over-potential of  $\sim 200$  mV with respect to the RHE potential, in accordance with previous studies on layered MoS<sub>2</sub> materials (see ref. 71 in the main test of the manuscript). It is worth to note that this value is similar to that obtained for the MoS<sub>3</sub> (180 mV) (see Fig. 6 in the main text) used as EC in the photocathodes here studied, suggesting its possible exploitation in the photocathodes' structures as well as EC.

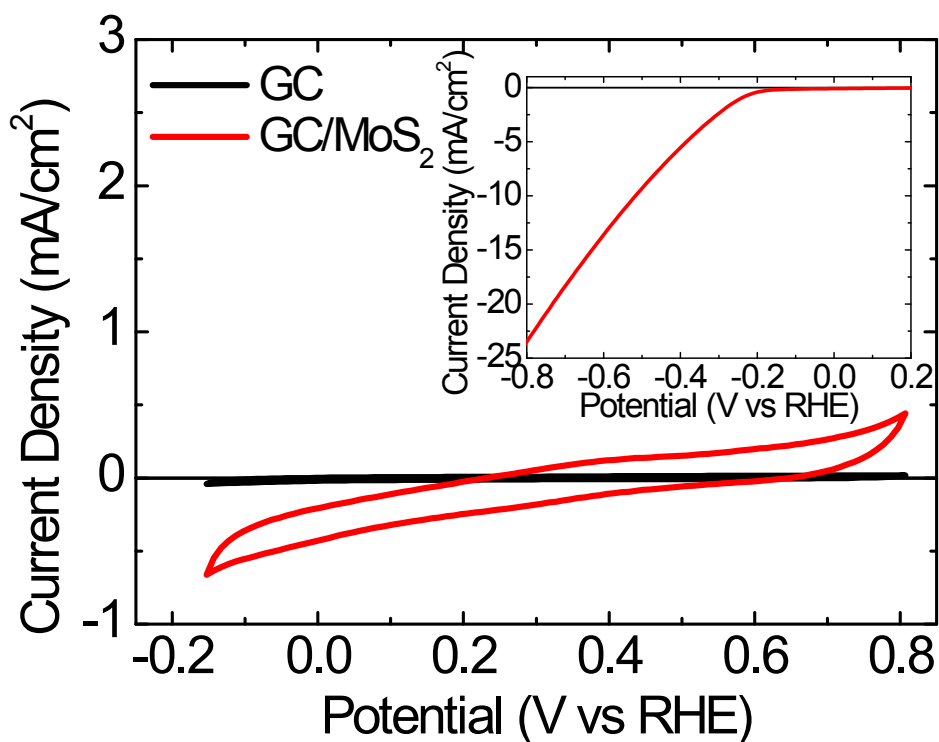

**Fig. S8** CVs measured for GC and GC/MoS<sub>2</sub> samples in 0.5 M H<sub>2</sub>SO<sub>4</sub> solution at pH 1. Voltage scan rate: 500 mV s<sup>-1</sup>. MoS<sub>2</sub> films are deposited on glassy carbon (GC) substrates by consequent drop casting steps from 0.4 mg mL<sup>-1</sup> MoS<sub>2</sub> dispersion in IPA until reaching a loading of MoS<sub>2</sub> of 0.5 mg cm<sup>-1</sup>. The inset panel show the HER-electrocatalytic activity of MoS<sub>2</sub> flakes, as measured by LSV on GC/MoS<sub>2</sub> sample.

## References

- 1 C. Lee, H. Yan, L. E. Brus, T. F. Heinz, J. Hone and S. Ryu, ACS Nano, 2010, **4**, 2695.
